# Supplementary material for: Characterizing the automatic radon flux transfer standard system Autoflux: laboratory calibration and field experiments
Source: Copernicus journal article supplement (doi:10.5194/amt-16-2655-2023), 2023-05-31
Supplement: Supplementary file 1 [file amt-16-2655-2023-supplement.pdf]

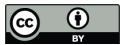

*Supplement of*

## **Characterizing the automatic radon flux transfer standard system Autoflux: laboratory calibration and field experiments**

**Claudia Grossi et al.**

*Correspondence to:* Claudia Grossi ([claudia.grossi@upc.edu](mailto:claudia.grossi@upc.edu))

The copyright of individual parts of the supplement might differ from the article licence.

Here we present the support material of the Grossi et al., manuscript: ‘Characterizing the automatic radon flux Transfer Standard system *Autoflux*: laboratory calibration and field experiments’.

**Table S1. Summary of the exhalation bed facilities studied.**

| Institution                                       | $F$ (mBq m <sup>-2</sup> s <sup>-1</sup> ) | Reference                       |
|---------------------------------------------------|--------------------------------------------|---------------------------------|
| CANMET Elliot lake Laboratory (Canada)            | 285 ± 41                                   | Stieff et al. (1996)            |
| Radon Laboratory of the University of South China | 1480 ± 50                                  | Tan & Xiao (2011)               |
| Oak Ridge Associated Universities (USA)           | 430 to 80                                  | Altic (2014)                    |
| Institute of Industrial Ecology (Russia)          | 700 ± 80                                   | Onishchenko et al. (2015)       |
| University of Huelva (Spain)                      | 13.3 ± 0.2                                 | Gutiérrez-Álvarez et al. (2020) |
|                                                   | 23.4 ± 0.3                                 |                                 |

**Table S2. Sensor features used to monitor the environmental conditions.**

| Sensor        | Manufacturer | Model  | Range            | Declared Accuracy |
|---------------|--------------|--------|------------------|-------------------|
| Temperature   | Testo        | 175T2  | (-35 to 55) °C   | ±0.5 °C           |
|               |              | Probe  | (-40 to 120) °C  | ±0.3 °C           |
| Soil moisture | ODYSSEY      | Xtreem | (0 to 100) %     | ±1%               |
| Pressure      | ITEFI-CSIC   | -      | (-600 to 600) Pa | ± 3 Pa            |

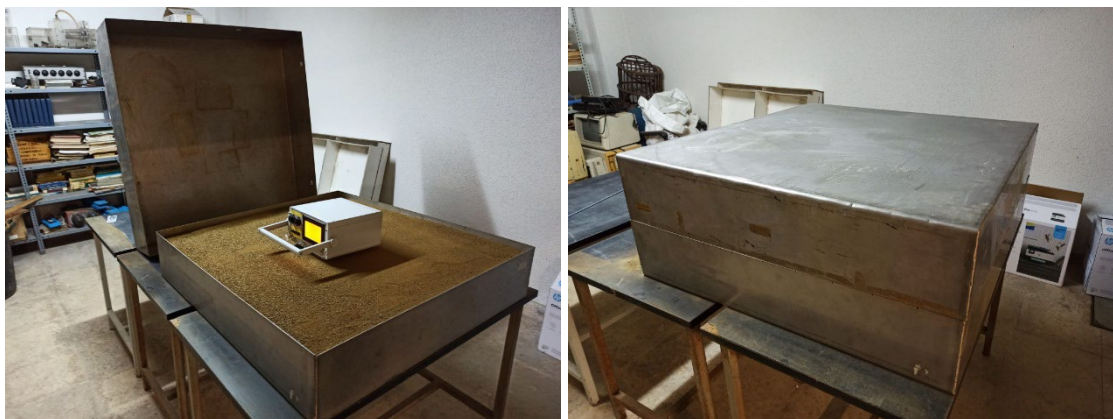

**Figure S1. Picture of the setup used to empirically determine the exhalation rate reference value of the EB.**

**Table S3. Main characteristics of radon flux systems available from the literature.**

| <b>C<br/>o<br/>d<br/>e</b> | <b>Manufacture<br/>r</b>         | <b>Volu<br/>me<br/>(m<sup>3</sup>)</b> | <b>Exhalati<br/>o area<br/>(m<sup>2</sup>)</b> | <b>Refr<br/>esh*</b> | <b>Chamb<br/>er<br/>shape</b>            | <b>Radon monitor /mode</b>                                     | <b>Enviro<br/>nment<br/>al<br/>sensors<br/>within<br/>the<br/>monito<br/>r</b> | <b>Env<br/>iron<br/>.<br/>Sens<br/>ors<br/>with<br/>in<br/>the<br/>Cha<br/>mbe<br/>r</b> | <b>Source</b>                                                                                                                                   |
|----------------------------|----------------------------------|----------------------------------------|------------------------------------------------|----------------------|------------------------------------------|----------------------------------------------------------------|--------------------------------------------------------------------------------|------------------------------------------------------------------------------------------|-------------------------------------------------------------------------------------------------------------------------------------------------|
| 1                          | ANSTO                            | 0.019                                  | 0.13                                           | Y                    | Drum                                     | AG/Pump                                                        | Y                                                                              | N                                                                                        | -                                                                                                                                               |
| 2                          | ANSTO                            | 0.018                                  | 0.26                                           | N                    | Shallow<br>conical                       | AG2 x 1L lucas cells<br>(separated by 6 min flow<br>path)/Pump | Y                                                                              | N                                                                                        | Zahorowski and<br>Whittlestone, 1996                                                                                                            |
| 3                          | LICOR                            | 0.041                                  | 0.03                                           | Y                    | Hemisp<br>here                           | -/Pump                                                         | -                                                                              | N                                                                                        | <a href="https://www.licor.com/env/products/soil_flux/#chamber-difference">https://www.licor.com/env/products/soil_flux/#chamber-difference</a> |
| 4                          | IPSN                             | 0.037                                  | 0.21                                           | Y                    | Cylinde<br>r                             | AG/Pump                                                        | Y                                                                              | N                                                                                        | Ferry et al., 2001                                                                                                                              |
| 5                          | Univ. of<br>Wisconsin-<br>Madiso | 0.002,<br>0.018,<br>0.352              | 0.02 ,<br>0.07,<br>2.32                        | N                    | Circular<br>,<br>Circular<br>,<br>Square | RAD7/Pump                                                      | Y                                                                              | N                                                                                        | Stefani et al., 2016                                                                                                                            |
| 6                          | Helmholtz<br>Zentrum<br>München  | 0.044                                  | 0.13                                           | Y                    | Cylinde<br>r                             | 6 Lucas cells/Pump                                             | N                                                                              | Y                                                                                        | Yang et al., 2017                                                                                                                               |
| 7                          | UPC                              | -                                      | 0.01                                           | Only<br>pum<br>p     | Cylinde<br>r                             | DOSEman/Diffusion                                              | N                                                                              | N                                                                                        | -                                                                                                                                               |
| 8                          | UC                               | 0.008                                  | 0.04                                           | Only<br>pum<br>p     | Rectang<br>ular                          | AlphE/Diffusion                                                | N                                                                              | N                                                                                        | -                                                                                                                                               |

1

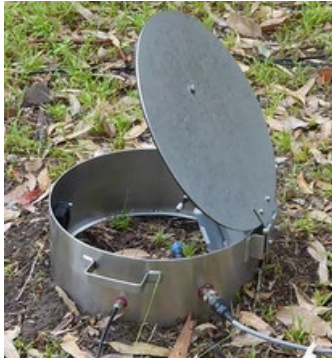

2

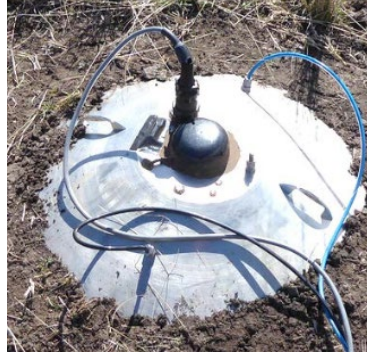

3

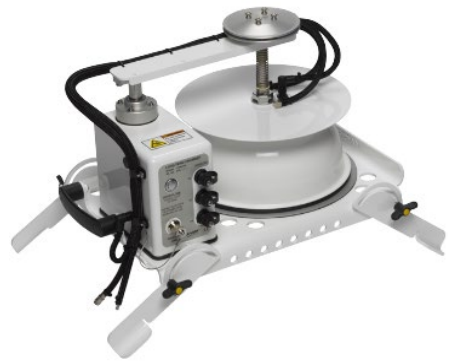

4

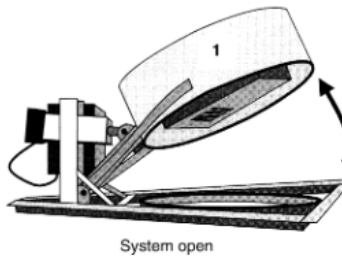

5

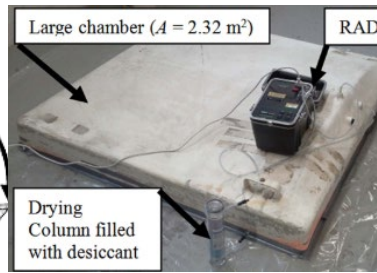

6

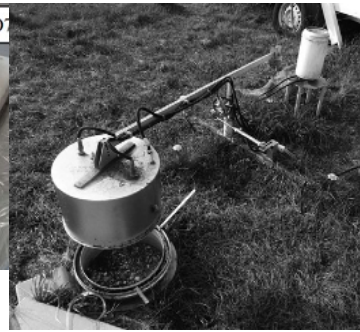

7

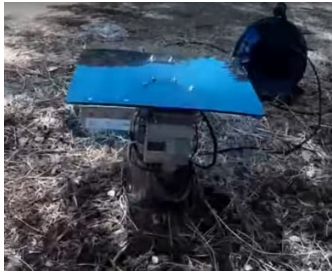

8

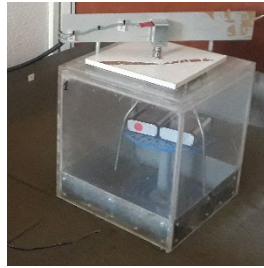

Figure S2. Pictures of enlisted radon chambers, code numbers correspond to those in Table S3.

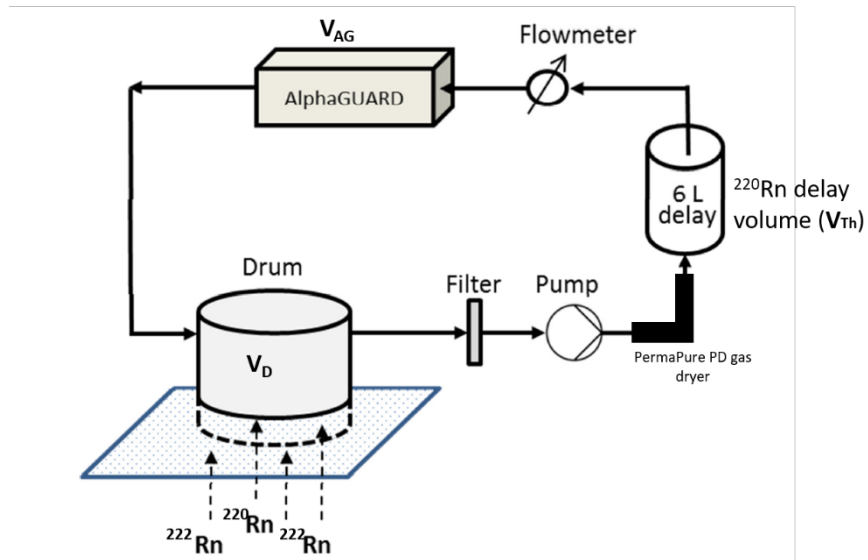

Figure S3. Schematic representation of the *AutoFlux* system (ANSTO).

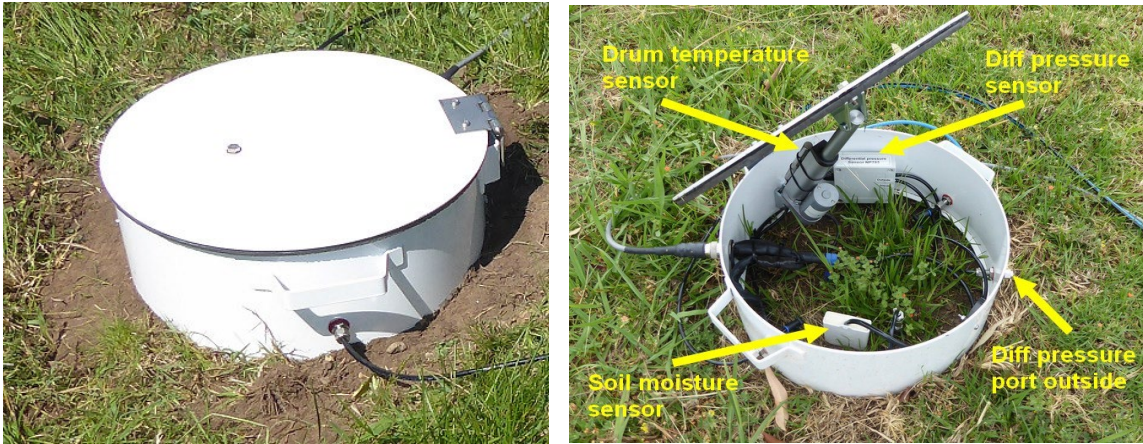

Figure S4. *AutoFlux* drum during a typical radon flux measurement: accumulation period (1 hour, on the left side) and ventilation period (2 hours, right side).

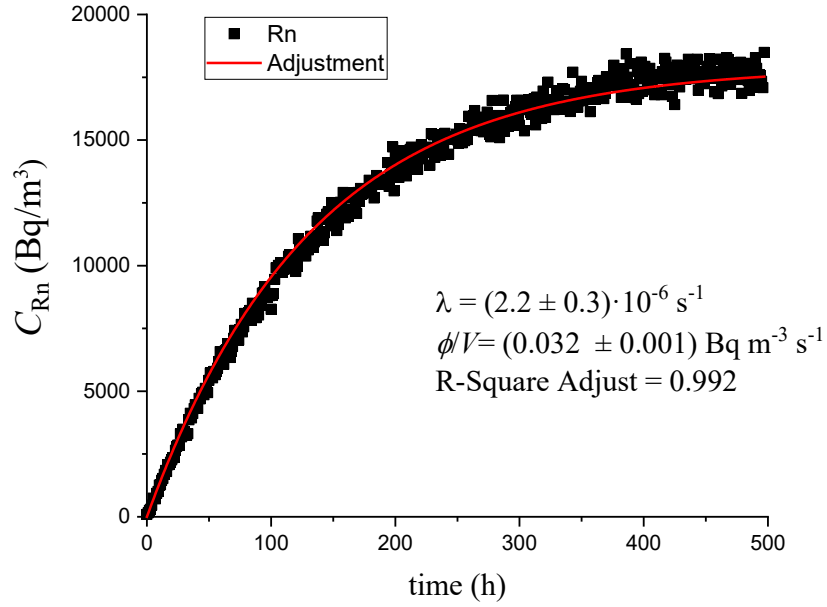

Figure S5. Evolution of radon concentration with time in a volume  $V$  during the experiment to establish the emanation factor  $\varepsilon$  of the radon from the soil sample. The coefficients of the exponential fit are presented.

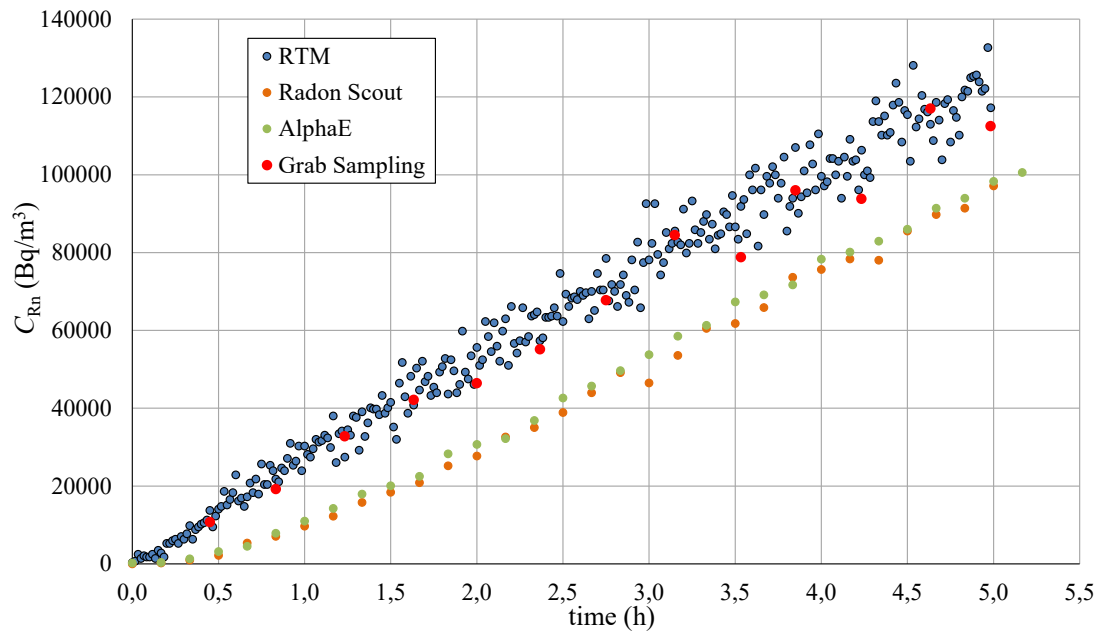

Figure S6. Example of radon concentration over time during the experimental determination of exhalation rate.



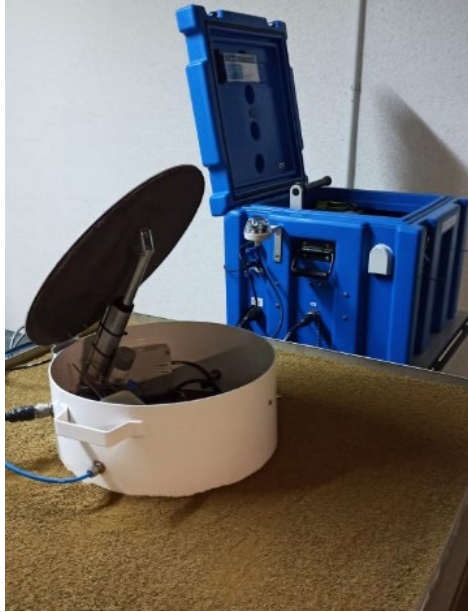

Figure S7. Setup of the *AutoFlux* during a typical laboratory measurement at UC.

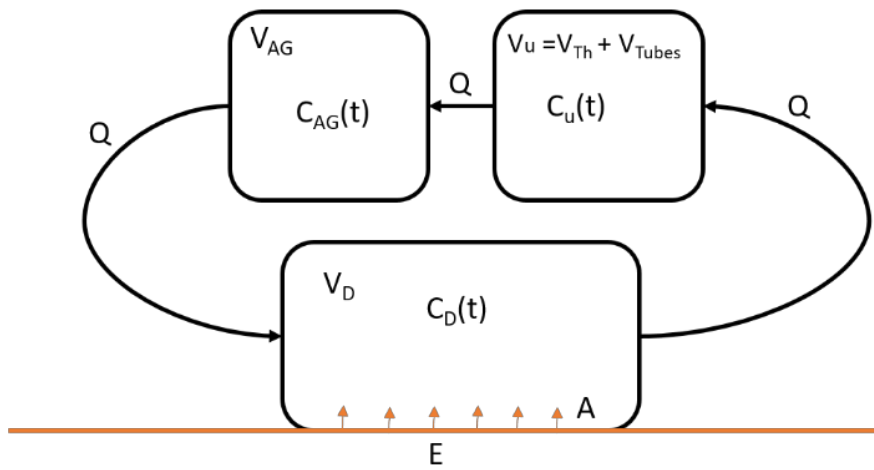

Figure S8. Conceptual box model of the ANSTO *AutoFlux* system.

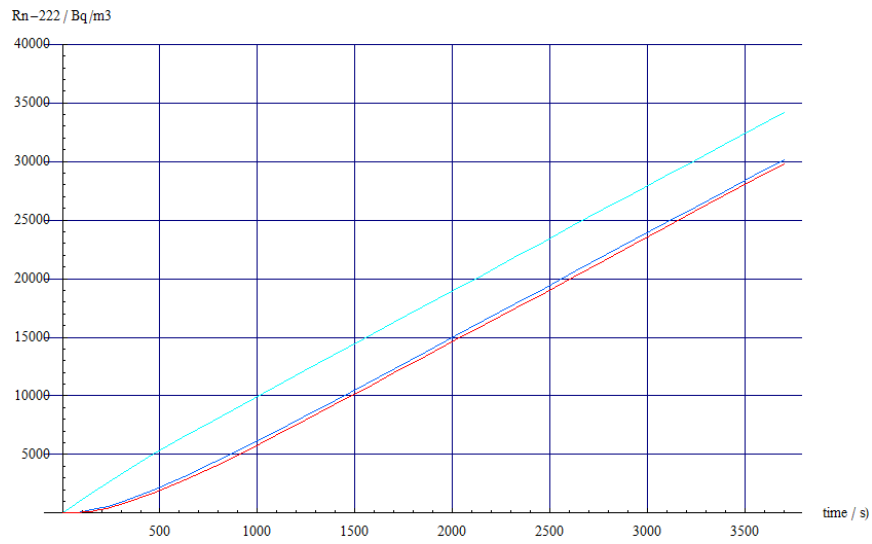

**Figure S9.** Simulated  $^{222}\text{Rn}$  concentration behavior within each one of the volumes of the *AutoFlux* system during the hour for which the chamber was closed  $C_D$  (light blue line),  $C_u$  (blue line) and  $C_{AG}$  (red line).
